# Supplementary material
Source: publisher site journal article supplement (https://www.dovepress.com/article/255256)
Supplement: Supplementary file 1 [file get_supplementary_file.php]

## Appendix 1: Search Strategy

Medline Complete Search Conducted in December 2019

| Domain                     | Alternative Words/Concept Expansion                                                                                                                                                                                                                                                                 | Search | Query                                                                                                                                                                                                                                                                                                                                                                                                                                | Records Retrieved |
|----------------------------|-----------------------------------------------------------------------------------------------------------------------------------------------------------------------------------------------------------------------------------------------------------------------------------------------------|--------|--------------------------------------------------------------------------------------------------------------------------------------------------------------------------------------------------------------------------------------------------------------------------------------------------------------------------------------------------------------------------------------------------------------------------------------|-------------------|
| Nutritional care           | Nutrition* care<br>Nutrition* intake<br>Nutrition* intervention*<br>Nutrition support<br><b>MESH</b><br>Malnutrition <ul style="list-style-type: none"> <li>• Malnutrition</li> <li>• Protein-energy malnutrition</li> </ul> Nutrition Policy<br>Meals<br>Nutrition assessment<br>Nutrition Therapy | #1     | TI "nutrition* care" OR "nutrition* intervention*" OR "nutrition* support*" OR "nutrition therapy" OR "nutrition* intake" AB "nutrition* care" OR "nutrition* intervention*" OR "nutrition* support*" OR "nutrition therapy" OR "nutrition* intake"                                                                                                                                                                                  | <b>12,698</b>     |
|                            |                                                                                                                                                                                                                                                                                                     | #2     | (MH "Nutrition Assessment") OR (MH "Nutrition Policy+") OR (MH "Nutrition Therapy+") OR (MH "Malnutrition+") OR (MH "Meals+")                                                                                                                                                                                                                                                                                                        | <b>229,766</b>    |
|                            |                                                                                                                                                                                                                                                                                                     | #3     | #1 OR #2                                                                                                                                                                                                                                                                                                                                                                                                                             | <b>237,770</b>    |
| Multidisciplinary delivery | Multidisciplinary<br>Inter-disciplinary<br>Interprofessional<br>Teamwork<br>Multidisciplinary team<br>Interdisciplinary support<br>Health professional<br>Staff<br><b>MESH</b><br>MH "Interdisciplinary Communication"<br>Crew Resource Management, Healthcare")                                    | #4     | AB (multidisciplinary or "multi-disciplinary" or "integrative team" or interdisciplinary or "inter-disciplinary" or interprofessional or "inter-professional" or "healthcare team" or teamwork* or "team work*") OR TI (multidisciplinary or "multi-disciplinary" or "integrative team" or interdisciplinary or "inter-disciplinary" or interprofessional or "inter-professional" or "healthcare team" or teamwork* or "team work*") | <b>129,224</b>    |
|                            |                                                                                                                                                                                                                                                                                                     | #5     | (MH "Interdisciplinary Communication")                                                                                                                                                                                                                                                                                                                                                                                               |                   |
|                            |                                                                                                                                                                                                                                                                                                     | #6     | (MH "Crew Resource Management, Healthcare")                                                                                                                                                                                                                                                                                                                                                                                          |                   |
|                            |                                                                                                                                                                                                                                                                                                     | #7     | #4 OR #5 OR #6                                                                                                                                                                                                                                                                                                                                                                                                                       | <b>147,769</b>    |

|                  |                                                                                                                   |     |                                                                                                                                                                                                                                    |                  |
|------------------|-------------------------------------------------------------------------------------------------------------------|-----|------------------------------------------------------------------------------------------------------------------------------------------------------------------------------------------------------------------------------------|------------------|
| Hospital setting | Hospital                                                                                                          | #8  | AB ("acute setting*" or hospital* or "acute hospital*" or "acute care" or ward* or inpatient* or "in-patient*") OR TI ("acute setting*" or hospital* or "acute hospital*" or "acute care" or ward* or inpatient* or "in-patient*") | <b>2,642,671</b> |
|                  | Inpatient                                                                                                         | #9  | (MH "Hospitals+") OR (MH "Hospital Units+")                                                                                                                                                                                        | <b>354,285</b>   |
|                  | Ward*                                                                                                             | #10 | (MH "Inpatients")                                                                                                                                                                                                                  | <b>19,595</b>    |
|                  | inpatient In-patient                                                                                              | #11 | #8 OR #9 OR #10                                                                                                                                                                                                                    | <b>2,797,693</b> |
|                  | <b>MESH</b>                                                                                                       | #12 | #3 AND #7 AND #11                                                                                                                                                                                                                  | <b>828</b>       |
|                  | Inpatient                                                                                                         | #13 | #3 AND #7 AND #11                                                                                                                                                                                                                  | <b>586</b>       |
|                  | Limited to; <ul style="list-style-type: none"> <li>• No date</li> <li>• English and English translated</li> </ul> |     |                                                                                                                                                                                                                                    |                  |

## Appendix 2: Data Extraction Instrument

|                                                                                       |  |
|---------------------------------------------------------------------------------------|--|
| <b>Study ID:</b>                                                                      |  |
| <b>Study Description</b>                                                              |  |
| Author (s)                                                                            |  |
| Year of publication                                                                   |  |
| Location (country of publication)                                                     |  |
| Aim                                                                                   |  |
| Patient population (e.g., age, gender, at-risk or with malnutrition)                  |  |
| <b>Method</b> (e.g., qualitative, quantitative)                                       |  |
| <b>Setting</b> (hospital and or specified ward)                                       |  |
| <b>Reported Interventions</b>                                                         |  |
| Definition and aspects of the food and nutritional care implemented.                  |  |
| Disciplines involved                                                                  |  |
| Collaborative activities and reported processes in Multidisciplinary nutritional care |  |
| <b>Outcomes</b>                                                                       |  |
| Patient, Team, and organizational outcomes of multidisciplinary nutritional care      |  |
| Key findings                                                                          |  |
| Notes                                                                                 |  |
